# Supplementary material for: Fusarium Mycotoxins in Swiss Wheat: A Survey of Growers’ Samples between 2007 and 2014 Shows Strong Year and Minor Geographic Effects
Source: MDPI journal article supplement (doi:10.3390/toxins9080246), 2017-08-09
Supplement: s1 [file s1]

**Table S1:** Regional distribution of wheat samples and weather conditions in May, June and July during the Swiss wide *Fusarium* toxin monitoring years **2007 to 2010**.

|             |                           |      | Eastern<br>Jura | N-E<br>plateau | Central<br>plateau | Western<br>plateau | E Alpine<br>N-slope | N-C<br>Grisons | Alpine<br>south |
|-------------|---------------------------|------|-----------------|----------------|--------------------|--------------------|---------------------|----------------|-----------------|
| N           |                           |      | 45              | 122            | 201                | 76                 | 9                   | 28             | 20              |
| <b>2007</b> | Mean temperature (°C)     | May  | 14.6            | 14.8           | 14.5               | 14.6               | 15.5                | 15.2           | 17.4            |
|             |                           | June | 17.5            | 17.9           | 17.7               | 18.0               | 18.6                | 18.5           | 20.1            |
|             |                           | July | 17.6            | 17.9           | 17.7               | 18.2               | 18.9                | 18.7           | 22.0            |
|             | Sum of precipitation (mm) | May  | 123             | 150            | 178                | 134                | 88                  | 73             | 129             |
|             |                           | June | 205             | 134            | 175                | 153                | 142                 | 172            | 266             |
|             |                           | July | 107             | 163            | 194                | 153                | 156                 | 146            | 98              |
| <b>2008</b> | Mean temperature (°C)     | May  | 15.0            | 15.3           | 15.2               | 15.0               | 16.8                | -              | 16.0            |
|             |                           | June | 16.8            | 17.3           | 17.5               | 17.7               | 18.2                | -              | 19.9            |
|             |                           | July | 18.3            | 18.2           | 18.6               | 19.0               | 18.7                | -              | 21.4            |
|             | Sum of precipitation (mm) | May  | 55              | 37             | 33                 | 59                 | 22                  | -              | 263             |
|             |                           | June | 45              | 116            | 74                 | 54                 | 66                  | -              | 165             |
|             |                           | July | 99              | 147            | 127                | 107                | 186                 | -              | 186             |
| <b>2009</b> | Mean temperature (°C)     | May  | 14.6            | 15.5           | 15.4               | 15.9               | -                   | 16.9           | 18.5            |
|             |                           | June | 15.6            | 16.7           | 16.7               | 17.1               | -                   | 17.3           | 20.4            |
|             |                           | July | 18.0            | 18.7           | 18.7               | 19.4               | -                   | 19.5           | 21.9            |
|             | Sum of precipitation (mm) | May  | 56              | 100            | 77                 | 40                 | -                   | 19             | 56              |
|             |                           | June | 82              | 144            | 126                | 83                 | -                   | 80             | 161             |
|             |                           | July | 89              | 156            | 178                | 92                 | -                   | 146            | 343             |
| <b>2010</b> | Mean temperature (°C)     | May  | 11.3            | 11.7           | 12.1               | 12.6               | 12.5                | 12.5           | 15.1            |
|             |                           | June | 16.4            | 16.4           | 16.7               | 17.2               | 17.4                | 17.6           | 19.9            |
|             |                           | July | 20.1            | 19.7           | 20.1               | 21.5               | 20.5                | 20.6           | 24.1            |
|             | Sum of precipitation (mm) | May  | 127             | 167            | 140                | 89                 | 136                 | 147            | 360             |
|             |                           | June | 74              | 148            | 103                | 52                 | 89                  | 50             | 164             |
|             |                           | July | 56              | 173            | 117                | 23                 | 180                 | 153            | 44              |

N = number of wheat samples. N-E = North-eastern, E = Eastern, N-slope = Northern slope, C = Central, N-C = Northern central. “-” = no samples obtained. Data from Western Jura and Central Alpine north slope are not included as samples were obtained from one year and one single sample, respectively.

**Table S2:** Weather conditions in the Central and Western plateau (canton Berne) in May, June and July during the *Fusarium* toxin monitoring years **2011 to 2014**.

| Year (N)  | Mean temperature (°C) |      |      | Sum of precipitation (mm) |      |      |
|-----------|-----------------------|------|------|---------------------------|------|------|
|           | May                   | June | July | May                       | June | July |
| 2011 (36) | 15.5                  | 17.0 | 16.8 | 87                        | 103  | 136  |
| 2012 (45) | 14.3                  | 17.8 | 18.5 | 85                        | 132  | 93   |
| 2013 (45) | 11.2                  | 16.4 | 20.8 | 132                       | 99   | 112  |
| 2014 (33) | 12.6                  | 18.1 | 17.9 | 103                       | 67   | 209  |

N = number of wheat samples
