# Supplementary material for: Fusarium Mycotoxins in Swiss Wheat: A Survey of Growers’ Samples between 2007 and 2014 Shows Strong Year and Minor Geographic Effects
Source: MDPI journal article supplement (doi:10.3390/toxins9080246), 2017-08-09

**Figure S1:**

Correlation of the deoxynivalenol (DON) contents between the swiss granum survey and the current study

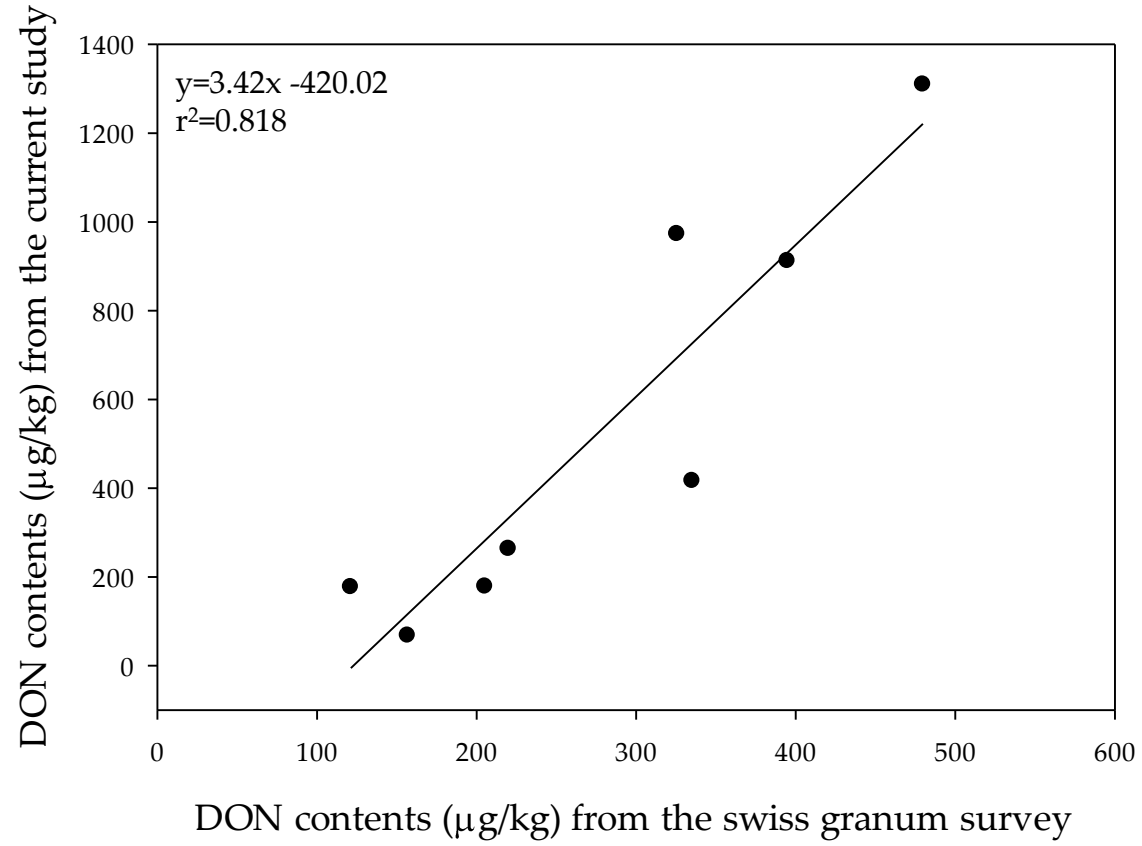

Supplement: s1 [file s1]
