# Supplementary material for: Fusarium Mycotoxins in Swiss Wheat: A Survey of Growers’ Samples between 2007 and 2014 Shows Strong Year and Minor Geographic Effects
Source: MDPI journal article supplement (doi:10.3390/toxins9080246), 2017-08-09
Supplement: s1 [file s1]

**Table S3:**

Results from the swiss granum analysis programme for deoxynivalenol (DON) in bread wheat 2007-2014

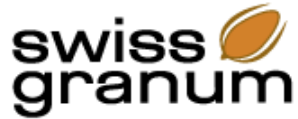

Schweizerische Branchenorganisation Getreide, Ölsaaten und Eiweisspflanzen  
Organisation de la Branche Suisse des Céréales, Oléagineux et Protéagineux

swiss granum  
Postfach 7957  
3001 Bern  
Tel. +41 (0)31 385 72 72  
Fax +41 (0)31 385 72 75  
info@swissgranum.ch  
www.swissgranum.ch

**Results from the swiss granum analysis programme for bread wheat (pre-sorted samples, second last cleaning step)**

|                                      | 2007 | 2008 | 2009 | 2010 | 2011 | 2012 | 2013 | 2014 |
|--------------------------------------|------|------|------|------|------|------|------|------|
| <b>Number of analysed samples</b>    | 130  | 132  | 131  | 122  | 126  | 132  | 115  | 104  |
| Samples with 0 mg/kg DON             | 48%  | 50%  | 63%  | 56%  | 79%  | 32%  | 62%  | 92%  |
| <i>n</i> =                           | 62   | 66   | 83   | 69   | 100  | 42   | 71   | 96   |
| Samples with > 0 - 0.75 mg/kg DON    | 39%  | 43%  | 34%  | 34%  | 21%  | 49%  | 38%  | 8%   |
| <i>n</i> =                           | 51   | 57   | 45   | 41   | 26   | 65   | 44   | 8    |
| Samples with > 0.75 – 1.25 mg/kg DON | 11%  | 5%   | 2%   | 7%   | 0%   | 13%  | 0%   | 0%   |
| <i>n</i> =                           | 14   | 7    | 2    | 9    | 0    | 17   | 0    | 0    |
| Samples with > 1.25 – 2 mg/kg DON    | 0%   | 0%   | 1%   | 1%   | 0%   | 5%   | 0%   | 0%   |
| <i>n</i> =                           | 0    | 0    | 1    | 1    | 0    | 6    | 0    | 0    |
| Samples with > 2 mg/kg DON           | 2%   | 2%   | 0%   | 2%   | 0%   | 1%   | 0%   | 0%   |
| <i>n</i> =                           | 3    | 2    | 0    | 2    | 0    | 2    | 0    | 0    |

0: below the limit of detection (200 µg/kg)

Source: swiss granum and Agroscope
